# Supplementary material
Source: publisher site journal article supplement (https://www.dovepress.com/article/423725)
Supplement: Supplementary file 1 [file get_supplementary_file.php]

Supplementary Table 1. Baseline characteristics of mild COVID-19 patients after propensity score matching

MAP: mean arterial pressure; BMI: ﻿body mass index;

Other chronic diseases included a history of pulmonary diseases, liver diseases and kidney diseases.

|  | Nirmatrelvir-Ritonavir  (n=55) | Azvudine  (n=35) | P value |
| --- | --- | --- | --- |
| Age | 38.0[32.0,48.0] | 40.0[31.0,47.0] | 0.927 |
| Sex (Male/Female) | 24/31 | 16/19 | 0.847 |
| MAP (mmHg) | 88.3[85.0,95.7] | 94.3[89.7,101.0] | 0.003 |
| BMI (kg/m2) | 23.78±4.15 | 23.52±4.93 | 0.924 |
| Oxygen saturation (%) | 89.0[86.5,90.0] | 90.0[86.0,91.0] | 0.218 |
| Leukocyte (*109/L) | 4.8[3.9,6.1] | 5.3[4.3,6.8] | 0.191 |
| Lymphocyte (*109/L) | 1.3[1.1,1.7] | 1.8[1.2,2.4] | 0.032 |
| Ct value of nucleic acid N gene | 27.8[23.5,31.6] | 26.5[23.4,33.0] | 0.858 |
| Ct value of nucleic acid O gene | 26.7[22.9,29.3] | 24.3[21.1,29.9] | 0.329 |
| Covid-19 vaccine doses |  |  | 0.638 |
| 0 | 4(7.3%) | 2(5.7%) |  |
| 1 | 2(3.6%) | 0 |  |
| 2 | 8(14.5%) | 4(11.4%) |  |
| 3 | 41(74.5%) | 29(82.9%) |  |
| Hypertension (n, %) | 2(3.6%) | 4(11.4%) | 0.149 |
| Diabetes (n, %) | 5(9.1%) | 2(5.7%) | 0.560 |
| Cardiovascular disease (n, %) | 1(1.8%) | 0 | 0.422 |
| Prior malignancy (n, %) | 1(1.8%) | 0 | 0.422 |
| Other chronic disease (n, %) | 3(5.5%) | 5(14.3%) | 0.151 |
| Symptoms (n, %) |  |  |  |
| Fever | 7(12.7%) | 5(14.3%) | 0.832 |
| Cough | 21(38.2%) | 23(65.7%) | 0.011 |
| Fatigue and myalgia | 6(10.9%) | 6(17.1%) | 0.396 |
| Nasal congestion | 4(7.3%) | 0 | 0.103 |
| Pharyngodinia | 10(18.9%) | 12(34.3%) | 0.083 |
| Dyspnoea | 0 | 1(2.9%) | 0.207 |
| Anosmia | 0 | 2(5.7%) | 0.073 |

Supplementary Table 2. Baseline characteristics of common COVID-19 patients after propensity score matching

|  | Nirmatrelvir-Ritonavir  (n=80) | Azvudine  (n=42) | P value |
| --- | --- | --- | --- |
| Age | 57.0[45.2,71.8] | 55.0[42.3,70.3] | 0.464 |
| Sex (Male/Female) | 38/42 | 20/22 | 0.941 |
| MAP (mmHg) | 96.0[85.4,103.0] | 95.7[86.7,105.8] | 0.808 |
| BMI (kg/m2) | 23.8±4.1 | 22.7±3.5 | 0.249 |
| Oxygen saturation (%) | 87.0[85.0,91.0] | 89.0[86.0,89.0] | 0.065 |
| Leukocyte (*109/L) | 4.7[4.0,6.3] | 4.7[3.5,5.6] | 0.248 |
| Lymphocyte (*109/L) | 1.3[0.9,1.6] | 1.4[1.1,1.9] | 0.047 |
| Ct value of nucleic acid N gene | 29.2[25.2,32.3] | 30.0[27.4,32.8] | 0.498 |
| Ct value of nucleic acid O gene | 27.0[22.5,30.7] | 27.0[25.4,30.0] | 0.997 |
| Covid-19 vaccine doses |  |  | 0.573 |
| 0 | 20(25.0%) | 15(35.7%) |  |
| 1 | 3(3.8%) | 2(4.8%) |  |
| 2 | 12(15.0%) | 4(9.5%) |  |
| 3 | 45(56.3%) | 21(50.0%) |  |
| Hypertension (n, %) | 20(25.0%) | 12(28.6%) | 0.670 |
| Diabetes (n, %) | 2(2.5%) | 2(4.8%) | 0.505 |
| Cardiovascular disease (n, %) | 15(18.8%) | 4(9.5%) | 0.182 |
| Prior malignancy (n, %) | 6(7.5%) | 1(2.4%) | 0.248 |
| Other chronic disease (n, %) | 18(22.5%) | 16(38.1%) | 0.068 |
| Symptoms (n, %) |  |  |  |
| Fever | 23(28.8%) | 7(16.7%) | 0.141 |
| Cough | 53(66.3%) | 35(83.3%) | 0.046 |
| Fatigue and myalgia | 27(33.8%) | 14(33.3%) | 0.963 |
| Nasal congestion | 4(5.0%) | 1(2.4%) | 0.480 |
| Pharyngodinia | 16(20.0%) | 6(14.3%) | 0.435 |
| Dyspnoea | 8(10.0%) | 1(2.4%) | 0.126 |
| Anosmia | 2(2.5%) | 0 | 0.302 |

MAP: mean arterial pressure; BMI: ﻿body mass index;

Other chronic diseases included a history of pulmonary diseases, liver diseases and kidney diseases.

Supplementary Table 3. Baseline characteristics of severe and critical COVID-19 patients after propensity score matching

|  | Nirmatrelvir-Ritonavir  (n=10) | Azvudine  (n=5) | P value |
| --- | --- | --- | --- |
| Age | 64.5[60.3,68.8] | 67.0[60.0,67.0] | 0.768 |
| Sex (Male/Female) | 4/6 | 3/2 | 0.464 |
| MAP (mmHg) | 89.8[80.2,98.2] | 106.0[94.5,120.2] | 0.055 |
| BMI (kg/m2) | 21.3±4.1 | 23.0±3.6 | 0.556 |
| Oxygen saturation (%) | 82.0[69.3,86.3] | 78.0[76.0,85.0] | 0.590 |
| Leukocyte (*109/L) | 5.4[4.3,7.8] | 7.0[3.5,11.4] | 0.898 |
| Lymphocyte (*109/L) | 0.7[0.47,0.87] | 1.3[1.0,1.6] | 0.004 |
| Ct value of nucleic acid N gene | 26.0[21.0,30.2] | 27.8[25.1,28.6] | 0.584 |
| Ct value of nucleic acid O gene | 25.5[22.5,30.2] | 24.8[24.16,29.8] | 0.879 |
| Covid-19 vaccine doses |  |  |  |
| 0 | 3(30.0%) | 1(20.0%) | 0.911 |
| 1 | 0 | 0 |  |
| 2 | 2(20.0%) | 1(20.0%) |  |
| 3 | 5(50.0%) | 3(60.0%) |  |
| Hypertension (n, %) | 6(60.0%) | 3(60.0%) | 0.706 |
| Diabetes (n, %) | 2(20.0%) | 1(20.0%) | 0.758 |
| Cardiovascular disease (n, %) | 4(40.0%) | 1(20.0%) | 0.439 |
| Prior malignancy (n, %) | 0 | 1(20.0%) | 0.143 |
| Other chronic disease (n, %) | 2(20.0%) | 2(40.0%) | 0.409 |
| Symptoms (n, %) |  |  |  |
| Fever | 4(40.0%) | 2(40.0%) | 0.713 |
| Cough | 8(80.0%) | 3(60.0%) | 0.409 |
| Fatigue and myalgia | 3(30.0%) | 0 | 0.171 |
| Nasal congestion | - | - |  |
| Pharyngodinia | 3(30.0%) | 0 | 0.171 |
| Dyspnoea | 5(50.0%) | 2(40.0%) | 0.714 |
| Anosmia | - | - |  |

MAP: mean arterial pressure; BMI: ﻿body mass index;

Other chronic diseases included a history of pulmonary diseases, liver diseases and kidney diseases.
